# Supplementary material for: Oxidation-induced modulation of photoresponsivity in monolayer MoS2 with sulfur vacancies
Source: Royal Society of Chemistry journal article supplement (doi:10.1039/d4nr02518k), 2024-01-01
Supplement: d4nr02518k1.pdf [file d4nr02518k1.pdf]

## Supporting Information

### Oxidation-Induced Modulation of Photoresponsivity in Monolayer MoS<sub>2</sub> with Sulfur Vacancies

Irfan H. Abidi,<sup>1,\*</sup> Ankit Bhoirya,<sup>1,2,3</sup> Pargam Vashishtha,<sup>1,2,3</sup> Sindhu Priya Giridhar,<sup>1</sup> Edwin LH Mayes,<sup>4</sup> Manoj Sehwat,<sup>1,2,3</sup> Ajay Kumar Verma,<sup>1,2,3</sup> Vishnu Aggarwal,<sup>1,2,3</sup> Tanish Gupta,<sup>1</sup> H.K. Singh,<sup>2,3</sup> Taimur Ahmed,<sup>1,5,4</sup> Nita Dilawar Sharma,<sup>2,3</sup> Sumeet Walia<sup>1,\*</sup>

<sup>1</sup> School of Engineering, RMIT University, 124 La Trobe Street, Melbourne, Victoria 3001, Australia

<sup>2</sup> CSIR-National Physical Laboratory, Dr. K.S. Krishnan Marg, New Delhi 110012, India

<sup>3</sup> Academy of Scientific & Innovative Research (AcSIR), Ghaziabad, 201002, India

<sup>4</sup> RMIT Microscopy and Microanalysis Facility, RMIT University, Melbourne 3000, Australia

<sup>5</sup> School of Computing, Pak-Austria Fachhochschule, Institute of Applied Sciences and Technology, Haripur, 22620, Pakistan

\* Correspondence to: Irfan H. Abidi ([Irfan.haider.abidi@rmit.edu.au](mailto:Irfan.haider.abidi@rmit.edu.au)) and Sumeet Walia ([sumeet.walia@rmit.edu.au](mailto:sumeet.walia@rmit.edu.au))

I.H. Abidi and A. Bhoirya are the equally contributing authors.

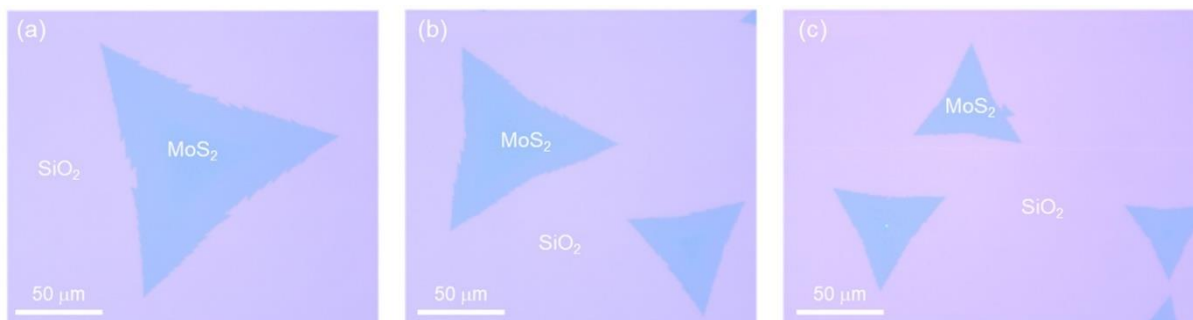

**Figure S1.** Optical images of LPCVD grown single-crystal MoS<sub>2</sub> flakes on 300 nm SiO<sub>2</sub>/Si substrates.

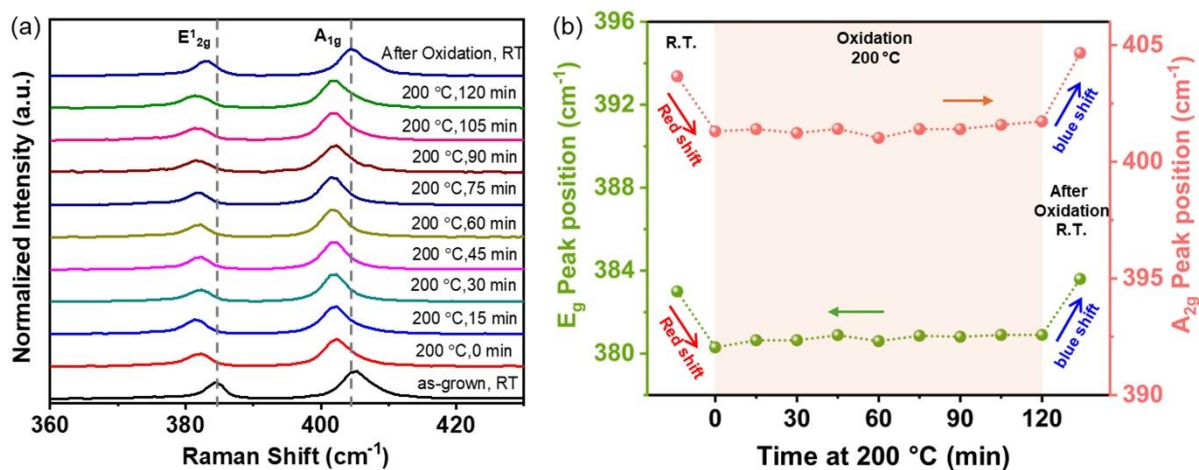

**Figure S2.** (a) Evolution of Raman spectra of as-grown MoS<sub>2</sub>, acquired during in-situ Raman analysis while heating from RT to 200 °C and subsequent cooling down to RT. (b) Plot showing shift in the peak position of E<sub>12g</sub> and A<sub>1g</sub> Raman modes with heating to 200 °C and cooling to RT.

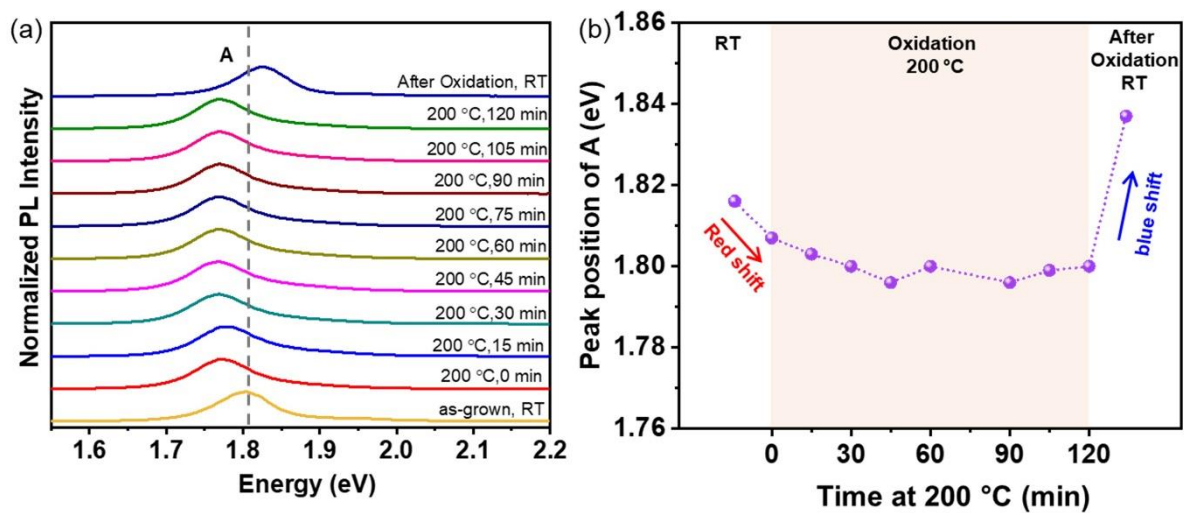

**Figure S3.** (a) Evolution of PL spectra of as-grown MoS<sub>2</sub>, acquired during in-situ PL analysis while heating from RT to 200 °C and subsequent cooling down to RT. (b) Plot showing shift in the peak position of A exciton during heating to 200 °C and cooling to RT.

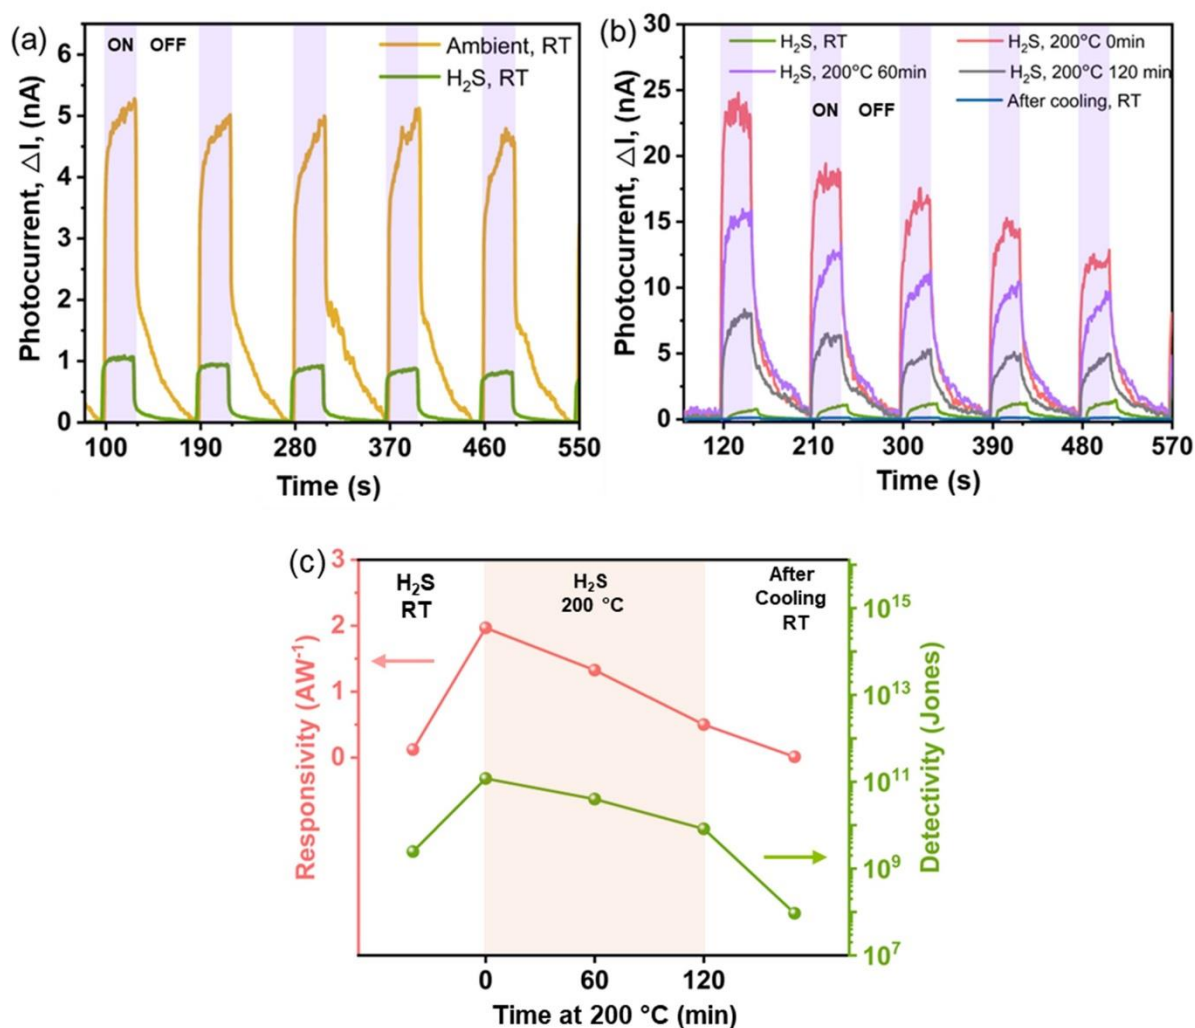

**Figure S4.** (a) Time-resolved photoresponse of as-grown MoS<sub>2</sub> based photodetector device tested under ambient conditions and H<sub>2</sub>S environment. (b) Temperature-dependent transient photoresponse of the MoS<sub>2</sub> based device tested under H<sub>2</sub>S environment. For this measurements, illumination wavelength of 660 nm, 3 mW/cm<sup>2</sup> of power density, and drain-source voltage ( $V_{DS}$ ) of 1V are used. (c) Temperature correlated performance parameters (responsivity and detectivity) of the device tested in H<sub>2</sub>S environment.
